# Supplementary material
Source: PubMed Central journal article supplement (PMC4066472)
Supplement: 1323287111_pnas.201323287SI.pdf [file 1323287111_pnas.201323287SI.pdf]

# Supporting Information

Malkova et al. 10.1073/pnas.1323287111

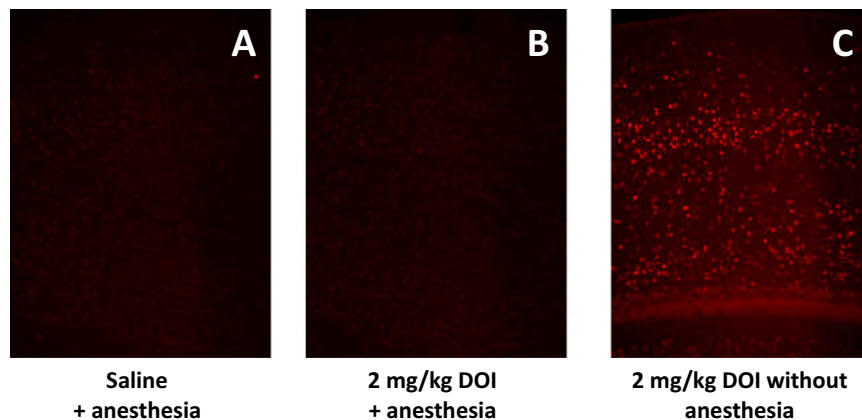

**Fig. S1.** Isoflurane anesthesia blocks 2,5-dimethoxy-4-iodoamphetamine-induced immediate early gene early growth response protein 1 (egr-1) response in the somatosensory cortex: saline i.p. and 2% isoflurane anesthesia (A), 2 mg/kg DOI i.p. and 2% isoflurane anesthesia (B), and 2 mg/kg DOI i.p. without anesthesia (C). To minimize the effect of external stimuli on the sensory cortex, mice were habituated to red light and silence 24 h before the experiment. On the day of the experiment, an awake animal was injected with 2 mg/kg DOI i.p. Two other mice were anesthetized with 2% isoflurane. Five minutes after anesthesia was applied, animals got 2 mg/kg DOI or saline i.p. Thirty minutes after injections, the animals were waken up, and 90 min after the injections, all animals were anesthetized using euthasol and perfused with 4% (vol/vol) paraformaldehyde (PFA). The brains were collected, fixed with 4% (vol/vol) PFA, treated with sucrose gradient [10–20% (vol/vol)], and frozen in Tissue-Tek O.C.T. compound (Sakura Finetek USA, Inc.). Immunohistochemical analysis of brain tissues showing nuclear localization, using egr-1 rabbit monoclonal antibodies (Cell Signaling Technology, USA, #4153), was performed.

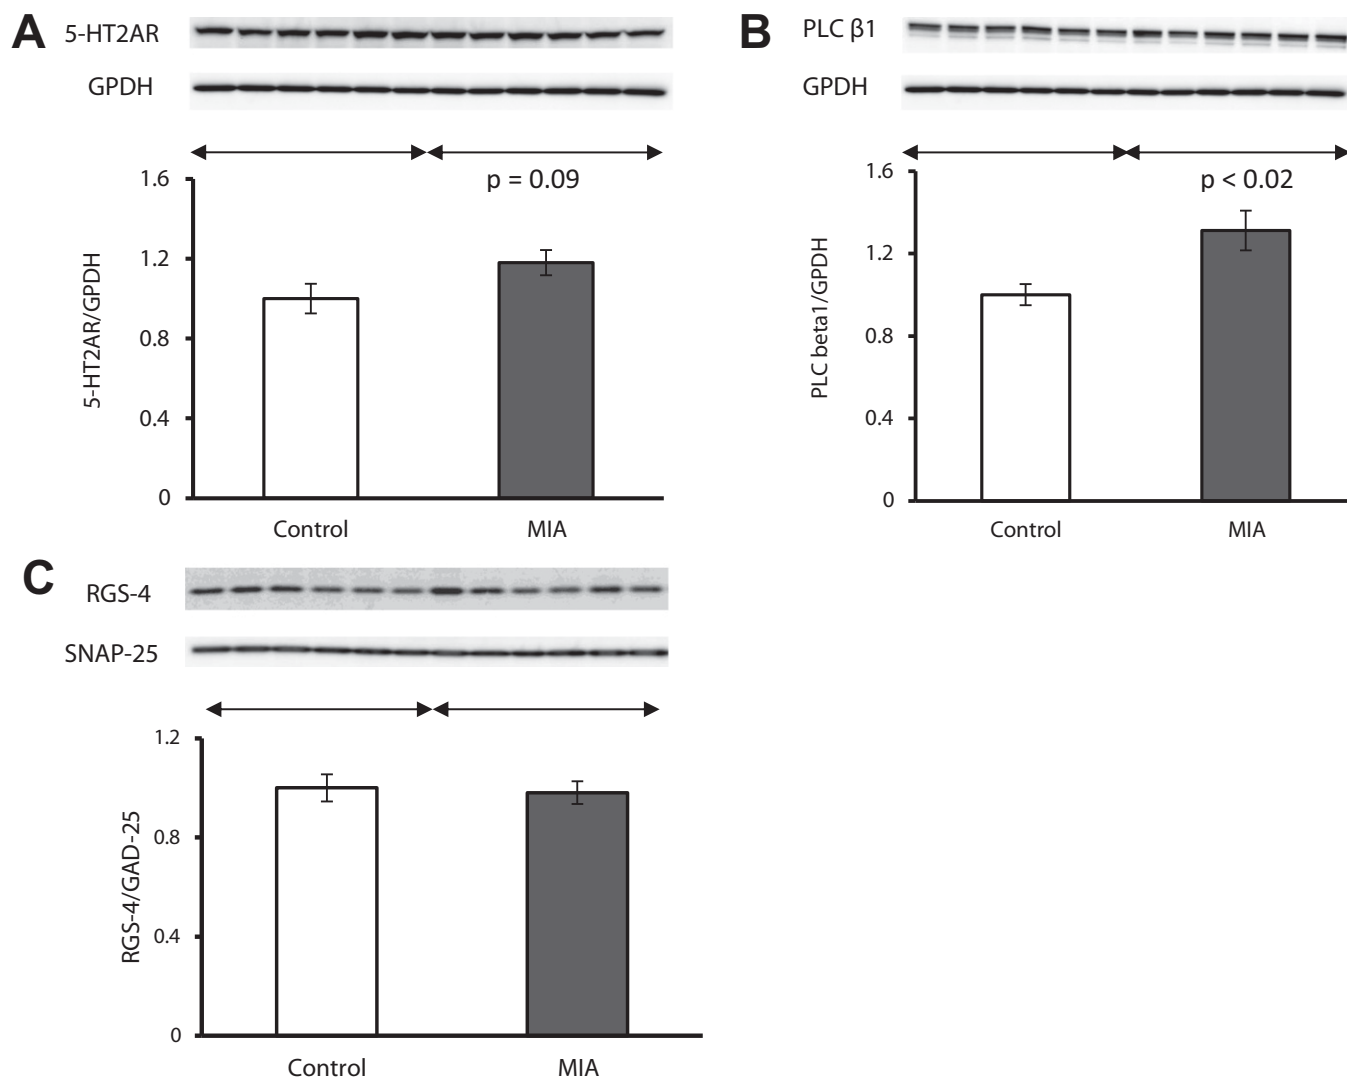

**Fig. 52.** MIA offspring display a trending increase at the protein level for serotonin receptor 2A (5-HT2AR) and phospholipase C  $\beta$ 1 (PLC  $\beta$ 1), but not regulator of G protein signaling 4 (RGS4) in the prefrontal cortex (PFC). Representative Western blots and corresponding densitometric analysis (normalized to GPDH or SNAP-25) for 5-HT2AR (A), PLC  $\beta$ 1 (B), and RGS-4 (C) are shown. PFC was isolated (six animals per group), then frozen in dry ice, and stored at  $-80^{\circ}\text{C}$ . Brain samples were sonicated in radioimmunoprecipitation assay buffer (150 mM sodium chloride, 1.0% Triton X-100, 0.5% sodium deoxycholate, 0.1% SDS, 50 mM Tris, pH 8.0) with protease inhibitor mixture. A BCA protein assay was conducted to quantify protein and ensure equal loading. Protein samples were heated in a sample buffer at  $95^{\circ}\text{C}$  for 5 min and subjected to SDS/PAGE on 4–20% acrylamide gels, followed by transfer to polyvinylidene difluoride membranes for overnight. Blocking of membranes occurred in Tris-buffered saline and Tween 20 buffer with 5% milk for an hour at room temperature. The membranes were then rinsed and incubated with the primary antibody overnight at  $4^{\circ}\text{C}$ , followed by secondary antibody incubation for 1 h. Data are mean  $\pm$  SEM.



**Table S1. Active volume of DOI-induced brain structures, which are revealed by  $2 \times 2$  multifactorial analysis ( $P < 0.0001$ )**

| Brain structure                   | % coverage | Active volume,<br>no. voxels |
|-----------------------------------|------------|------------------------------|
| Olfactory areas                   |            |                              |
| Anterior olfactory nucleus        | 9.2        | 431                          |
| Accessory olfactory bulb          | 3.7        | 45                           |
| Taenia tecta dorsal part          | 17.1       | 296                          |
| Subependymal zone                 | 14.6       | 163                          |
| Main olfactory bulb granule layer | 9.4        | 810                          |
| Cerebral cortex                   | 9.2        | 22,221                       |
| Endopiriform nucleus dorsal part  | 11.4       | 199                          |
| Midbrain                          | 8.4        | 3,879                        |
| Hippocampus                       |            |                              |
| Hippocampal formation             | 14.3       | 2,795                        |
| Ventral hippocampal commissure    | 22.7       | 44                           |
| Striatum                          |            |                              |
| Caudoputamen                      | 10.5       | 4,750                        |
| Lateral septal nucleus            | 6.5        | 57                           |
| Thalamus                          |            |                              |
| Ventral posteromedial nucleus     | 15.9       | 315                          |
| Reticular nucleus                 | 10.1       | 540                          |
| Ventral posterolateral nucleus    | 14.6       | 396                          |
| Medial geniculate complex         | 3.6        | 86                           |
| Lateral posterior nucleus         | 19.3       | 555                          |
| Posterior complex                 | 28.0       | 743                          |
| External medullary lamina         | 4.8        | 21                           |
| Mediodorsal nucleus               | 14.2       | 232                          |
| Anteromedial nucleus              | 32.5       | 319                          |
| Ventral anterior lateral complex  | 32.9       | 280                          |
| Anteroventral nucleus             | 7.1        | 28                           |
| Paraventricular nucleus           | 24.3       | 712                          |
| Parataenial nucleus               | 15.9       | 101                          |
| Intermediodorsal nucleus          | 13.6       | 22                           |
| Parafascicular nucleus            | 94.4       | 1,181                        |
| Stria medullaris                  | 9.3        | 56                           |
| Cerebellum                        | 3.9        | 4,992                        |
| Fiber tract                       |            |                              |
| Corpus callosum                   | 14.8       | 3,556                        |
| Stria terminalis                  | 17.6       | 164                          |

Areas that showed more than 2.5% coverage are presented.

**Table S2. Manganese-enhanced magnetic resonance imaging signal increase in MIA versus control offspring ( $P < 0.05$ )**

| Brain structure                   | % coverage | Active volume, no. voxels |
|-----------------------------------|------------|---------------------------|
| Olfactory areas                   |            |                           |
| Taenia tecta dorsal part          | 2.5        | 43                        |
| Subependymal zone                 | 3.1        | 35                        |
| Main olfactory bulb granule layer | 1.9        | 167                       |
| Cerebral cortex                   | 3.2        | 7,749                     |
| Endopiriform nucleus dorsal part  | 3.0        | 53                        |
| Midbrain                          | 2.0        | 915                       |
| Hippocampus                       |            |                           |
| Hippocampal formation             | 2.7        | 534                       |
| Ventral hippocampal commissure    | 14.9       | 29                        |
| Striatum                          |            |                           |
| Caudoputamen                      | 3.3        | 1,509                     |
| Thalamus                          |            |                           |
| Medial geniculate complex         | 1.9        | 45                        |
| Lateral posterior nucleus         | 11.8       | 339                       |
| Mediodorsal nucleus               | 0.9        | 14                        |
| Anteromedial nucleus              | 10.7       | 105                       |
| Ventral anterior lateral complex  | 10.0       | 85                        |
| Paraventricular nucleus           | 10.6       | 310                       |
| Parafascicular nucleus            | 94.4       | 1,181                     |
| Stria medullaris                  | 6.0        | 36                        |
| Cerebellum                        | 1.3        | 1,651                     |
| Fiber tract                       |            |                           |
| Corpus callosum                   | 3.0        | 714                       |
| Stria terminalis                  | 5.8        | 54                        |

**Table S3. The primers used in quantitative RT-PCR**

| Primer name                              | Sequences                                                           |
|------------------------------------------|---------------------------------------------------------------------|
| Egr-1                                    | 5'-GAGATGCAATTGATGTCTCCGCTG-3'<br>5'-GCGATGTCAGAAAAGGACTCTGTGG-3'   |
| Pan-brain-derived neurotrophic factor    | 5'-CAGCAAAGCCACAATGTTCC-3'<br>5'-TGTCGTCGTCAGACCTCTCG-3'            |
| COX-2                                    | 5'-GGATGGAAAATTGAAATATCAGGTC-3'<br>5'-GCTCAGGTGTTGCACGTAGTC-3'      |
| PLC $\beta$ 1                            | 5'-CATGGCAGGCTGCTGTACCC-3'<br>5'-AATAATFGGAGTAACAATAGTGGAGTCATCA-3' |
| RGS4                                     | 5'-GCTTCCTGCCTGAGGAGTGCA-3'<br>5'-ATCCAGAAGTCAATGTTCTCCTCGC-3'      |
| Cytoplasmic phospholipase A <sub>2</sub> | 5'-AGTGATGATGAGGCTCAAGGAC-3'<br>5'-TCTTACTTTTGACATCCAGTGGTTC-3'     |
| Serotonin transporter                    | 5'-GCACCAACTACTTCGCCCAGGAC-3'<br>5'-GCTGTCACCCACCCACCTTGC-3'        |
| Integrin $\beta$ 3                       | 5'-GTGTGCCGCTGTGACCAGGG-3'<br>5'-ACATTGCCCATGGCCGGAA-3'             |
| $\beta$ -actin                           | 5'-CACACCCGCCACCAGTTCG-3'<br>5'-CGCAGCTCATGTAGAAAGGTGTGG-3'         |
